# Supplementary material for: Enhanced recoverable energy storage density and efficiency in (1 − x)Ba0.85Ca0.15Zr0.1Ti0.9O3-xSrTiO3-MnO2 lead-free ceramics
Source: Royal Society of Chemistry journal article supplement (doi:10.1039/d2tc00056c), 2022-01-01
Supplement: d2tc00056c1.pdf [file d2tc00056c1.pdf]

**Supplementary material for**

**Enhanced recoverable energy storage density and efficiency in**

**(1-x)Ba<sub>0.85</sub>Ca<sub>0.15</sub>Zr<sub>0.1</sub>Ti<sub>0.9</sub>O<sub>3</sub>-xSrTiO<sub>3</sub>-MnO<sub>2</sub> lead-free ceramics**

Wenjin Yang,<sup>a</sup> Fengzhen Huang,<sup>\*,a</sup> LiHuai Shu,<sup>a</sup> YuLong Yang,<sup>a</sup> Baolian Gong,<sup>a</sup>  
Xiaomei Lu,<sup>\*\*,a</sup> and Jinsong Zhu<sup>a</sup>

<sup>a</sup>National Laboratory of Solid State Microstructures and Physics School, Nanjing  
University, Nanjing 210093, China

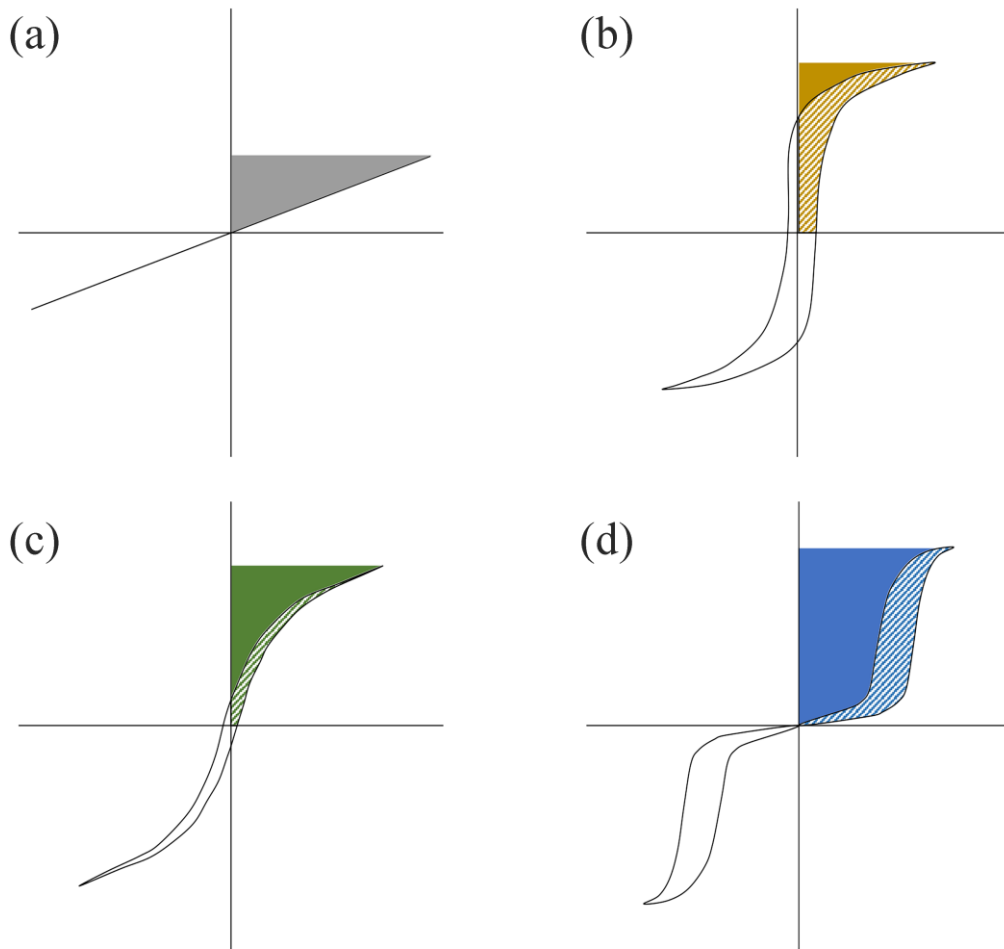

Figure S1 Schematic illustrations of hysteresis loops of: (a) linear dielectrics, (b) ferroelectrics, (c) relaxor ferroelectrics and (d) antiferroelectrics. The shaded areas and slash areas represent the recoverable energy density and dissipated energy density, respectively.

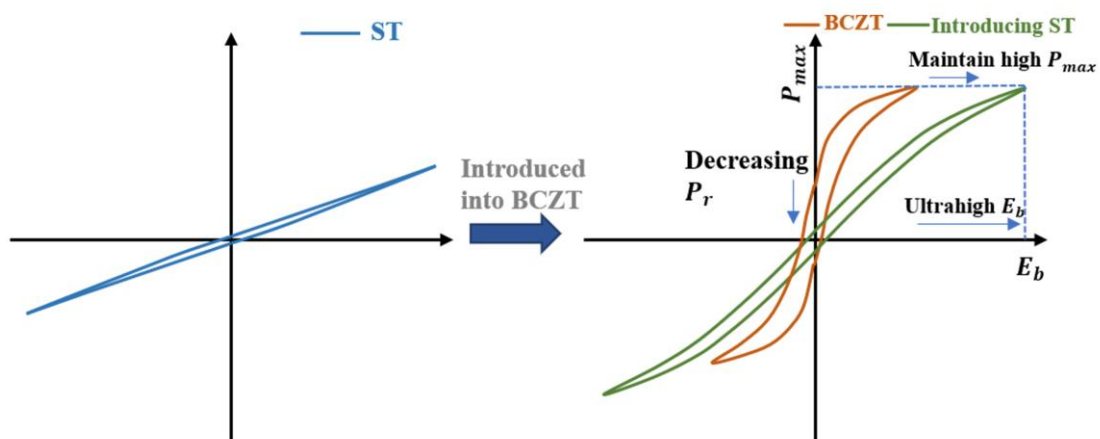

Figure S2 Scheme of the excellent energy storage performance obtained by constructing solid solution of BCZT and ST.

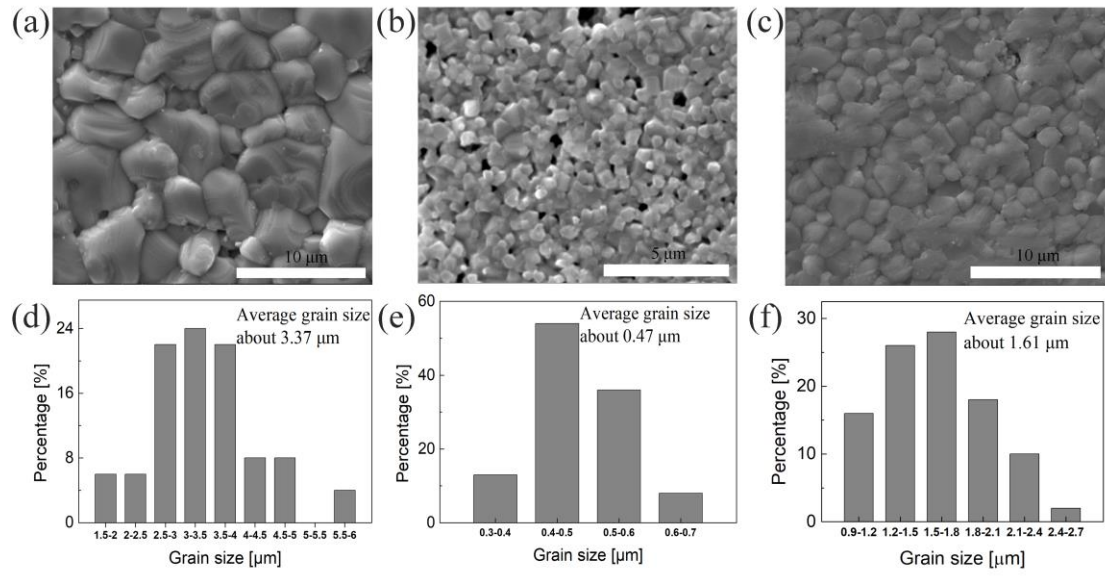

Figure S3 SEM images and the grain size distribution of (a) and (d) pure BCZT ceramics, (b) and (e) 0.4BCZT-0.6ST ceramics sintered at 1200 °C, (c) and (f) 0.4BCZT-0.6ST ceramics sintered with a two-step sintering method, where 3 mol% MnO<sub>2</sub> is added as sintering aid.
